# Supplementary material for: Single amino acid bionanozyme for environmental remediation
Source: PubMed Central journal article supplement (PMC8938493; doi:10.1038/s41467-022-28942-0), 2022-03-21
Supplement: 41467_2022_28942_MOESM1_ESM.pdf [file 41467_2022_28942_MOESM1_ESM.pdf]

## **SUPPLEMENTARY INFORMATION**

### **Single amino acid bionanozyme for environmental remediation**

Pandeeswar Makam<sup>1\*</sup>, Sharma S. R. K. C. Yamijala<sup>2,3,4</sup>, Venkata S. Bhadram<sup>5</sup>, Linda J. W. Shimon<sup>6</sup>,  
Bryan M. Wong<sup>2\*</sup>, and Ehud Gazit<sup>7,8\*</sup>

#### **Affiliations:**

<sup>1</sup> Department of Chemistry, Indian Institute of Technology (BHU), Varanasi, UP-221005, India.

<sup>2</sup> Department of Chemical & Environmental Engineering and Materials Science & Engineering Program, University of California-Riverside, Riverside, CA, 92521, USA.

<sup>3</sup> Department of Chemistry, Indian Institute of Technology Madras, Chennai - 600036, India.

<sup>4</sup> Center for Atomistic Modelling and Materials Design, IIT Madras, Chennai - 600036, India

<sup>5</sup> IMPMC, Sorbonne Université, CNRS, MNHN, 4, place Jussieu, 75005 Paris, France

Current address: Division of Sciences, Krea University, Sri City - 517646, India

<sup>6</sup> Chemical Research Support, The Weizmann Institute of Science, 7610001 Rehovot, Israel.

<sup>7</sup> The Shmunis School of Biomedicine and Cancer Research, Tel Aviv University, Tel Aviv 6997801, Israel.

<sup>8</sup> Department of Materials Science and Engineering, Iby and Aladar Fleischman Faculty of Engineering, Tel Aviv University, Tel Aviv 6997801, Israel.

\*Correspondence: pandeeswar.chy@itbhu.ac.in, bryan.wong@ucr.edu, and ehudg@post.tau.ac.il

**Supplementary Table 1. Crystallographic Data collection and refinement statistics of F-Cu**

| <b>Compound</b>                                               | <b>F-Cu</b>                                                     |
|---------------------------------------------------------------|-----------------------------------------------------------------|
| CCDC                                                          | 1871975                                                         |
| Diffractometer                                                | ESRF ID23-1                                                     |
| Empirical formula                                             | C <sub>18</sub> H <sub>20</sub> CuN <sub>2</sub> O <sub>4</sub> |
| Formula weight (g/mol)                                        | 391.90                                                          |
| Crystal description                                           | Blue plate                                                      |
| Temperature (K)                                               | 100                                                             |
| Wavelength (Å)                                                | 0.70                                                            |
| Crystal system                                                | Monoclinic                                                      |
| Space group                                                   | <i>P2<sub>1</sub></i>                                           |
| <i>a, b, c</i> (Å)                                            | 9.4800(19), 5.1500(10), 16.670(3)                               |
| $\alpha, \beta, \gamma$ (°)                                   | 90, 98.93(3), 90                                                |
| Volume (Å <sup>3</sup> )                                      | 804.0(3)                                                        |
| <i>Z</i>                                                      | 2                                                               |
| Density calculated (mg/m <sup>3</sup> )                       | 1.619                                                           |
| Absorption coefficient (mm <sup>-1</sup> )                    | 1.385                                                           |
| F(000)                                                        | 406                                                             |
| Crystal size (mm)                                             | 0.15x0.10x0.01                                                  |
| Theta range for data collection (°)                           | 1.218 to 31.926                                                 |
| Reflections collected (unique)                                | 9071(5472)                                                      |
| R int                                                         | 0.0435                                                          |
| Completeness (%)                                              | 95.3                                                            |
| Data\restraints\<br>parameters                                | 5472/1/242                                                      |
| Goodness-of-fit on F <sup>2</sup>                             | 1.105                                                           |
| Final R [ <i>I</i> >2σ( <i>I</i> )]                           | R1=0.0462, wR2=0.1234                                           |
| R (all data)                                                  | R1=0.0475, wR2=0.1256                                           |
| Largest diff. peak and hole (e <sup>-</sup> Å <sup>-3</sup> ) | 1.416 and -0.548                                                |

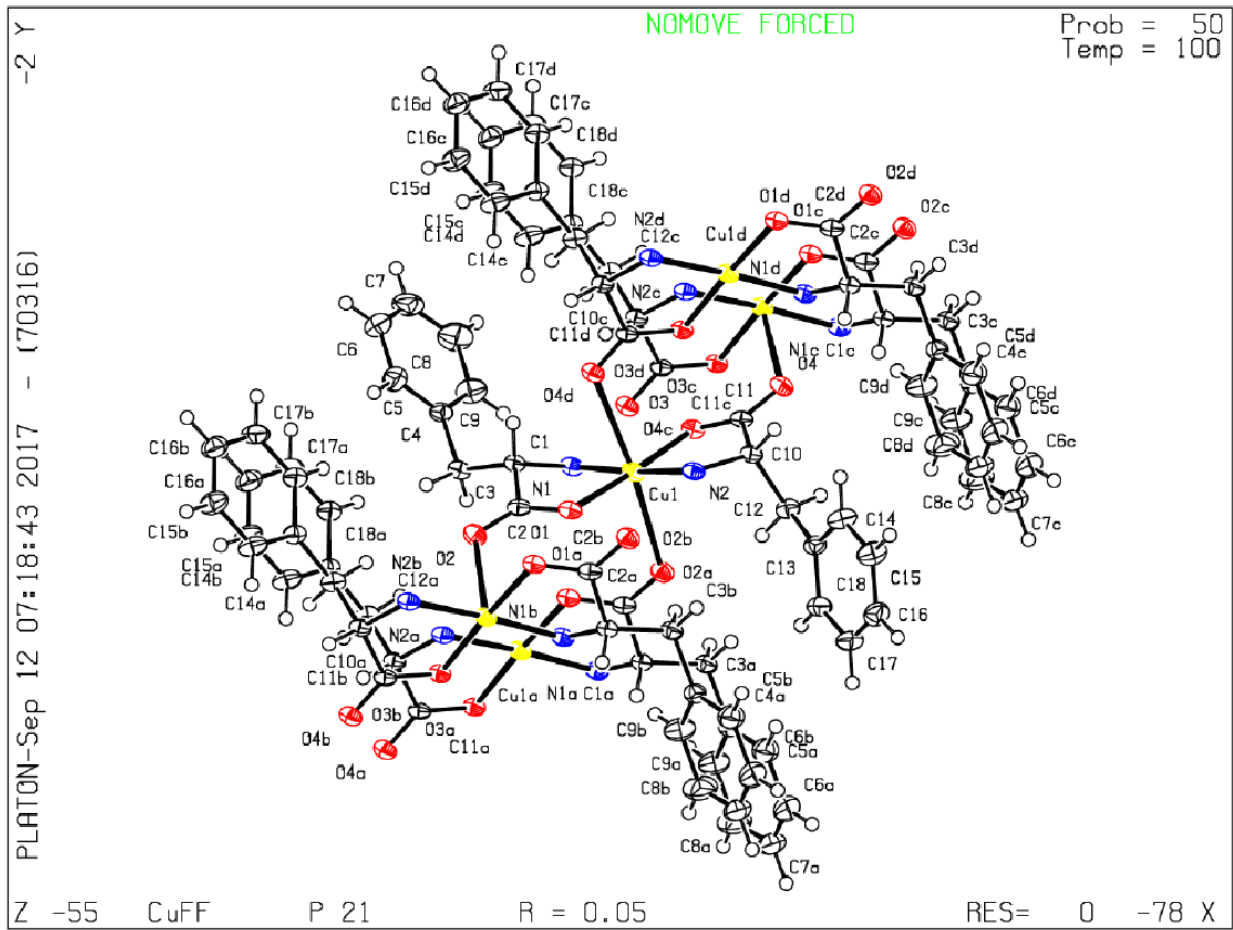

ORTEP diagram of the F-Cu crystal structure

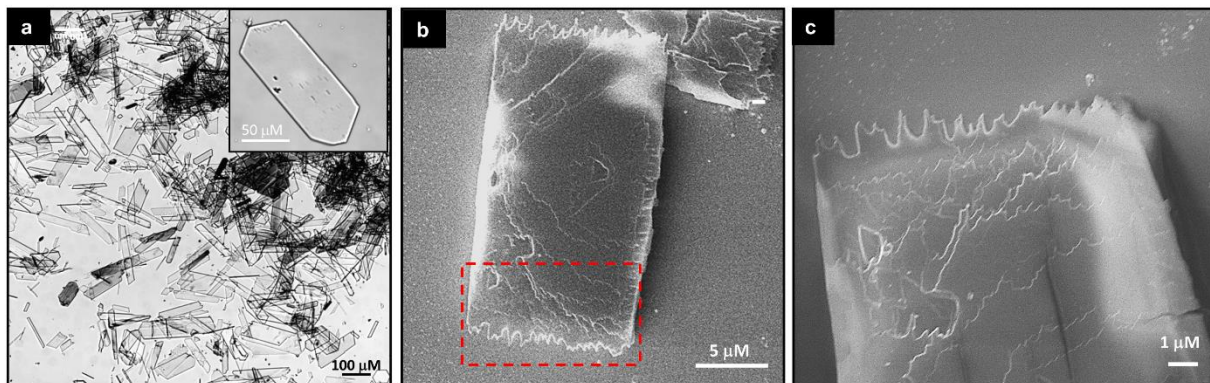

**Supplementary Fig. 1. Microscopic images of F-Cu crystals.** **a**, Optical microscope images. The inset depicts the enlarged single crystal. **b** and **c**, HRSEM images. Each experiment was repeated three times independently with similar results.

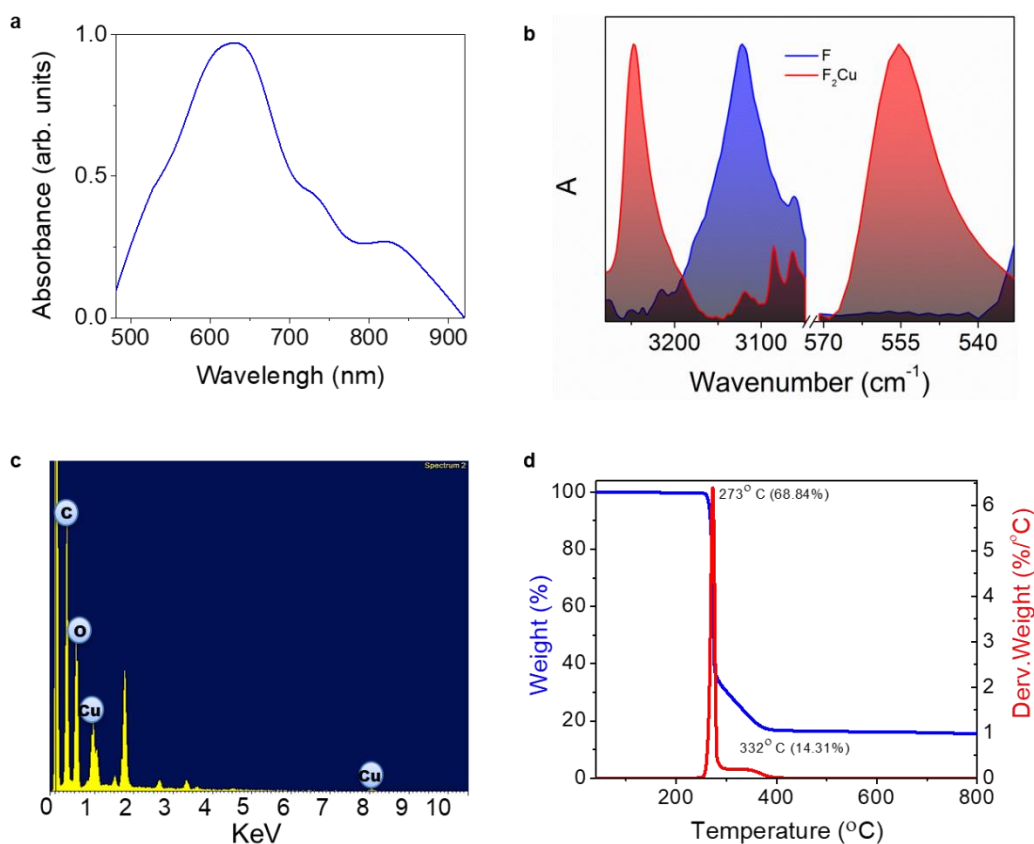

**Supplementary Fig. 2. Spectroscopic characterization of the F-Cu bionanozyme.** **a**, UV-vis absorption spectra. **b**, FTIR spectra (3270–3040 ( $\nu_{N-H}$ ) and 580–540  $\text{cm}^{-1}$  ( $\nu_{M-O}$ ) region of phenylalanine (F) and F-Cu. **c**, EDS spectra. **d**, TGA of F-Cu bionanozyme (blue curve) revealing the high thermal stability ( $\leq 273$  °C). The weight losses are depicted by the first derivative curve (red).

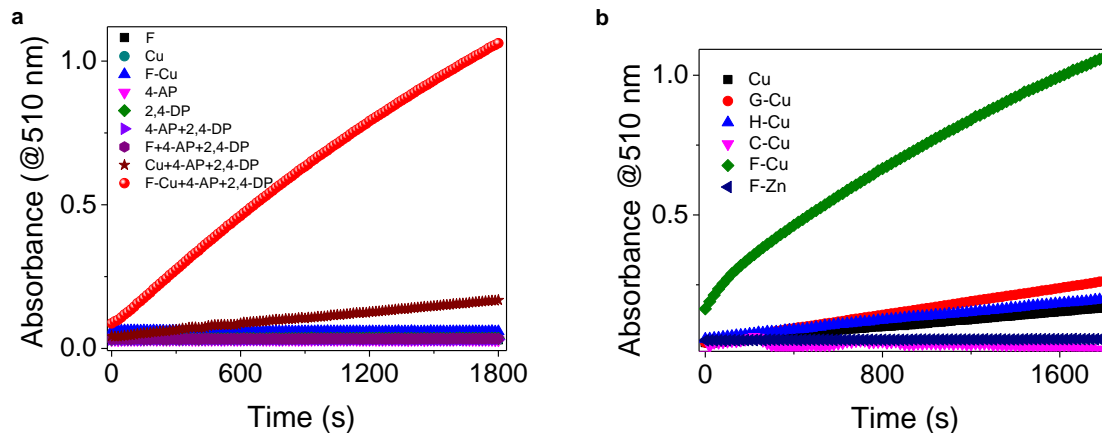

**Supplementary Fig. 3. Catalytic activity in control experiments, a**, Reaction progress in the presence of all the control building blocks of the F-Cu bionanozyme. Only the F-Cu bionanozyme can catalyze the oxidation of 2,4-DP into a colored product with an absorbance at 510 nm. No significant oxidation was observed when omitting either the phenylalanine (F) molecule or Cu from the catalytic system. **b**, Reaction progress in the presence of different copper complexes of amino acids (glycine (G-Cu), histidine (H-Cu), cysteine (C-Cu), and phenylalanine (F-Cu)) and the phenylalanine-zinc (F-Zn) complex.

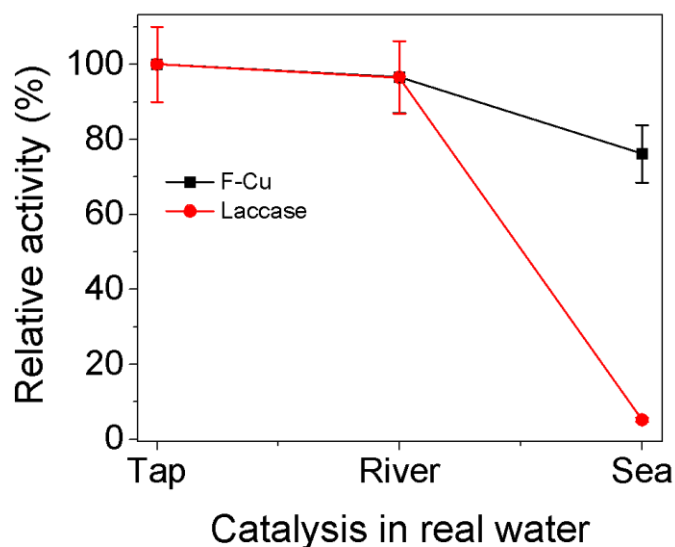

**Supplementary Fig. 4.** Relative catalytic activity of F-Cu bionanozyme in real water samples (tap water, river water, and seawater). N = 3 independent experiments, error bars represent standard deviations of three independent measurements.

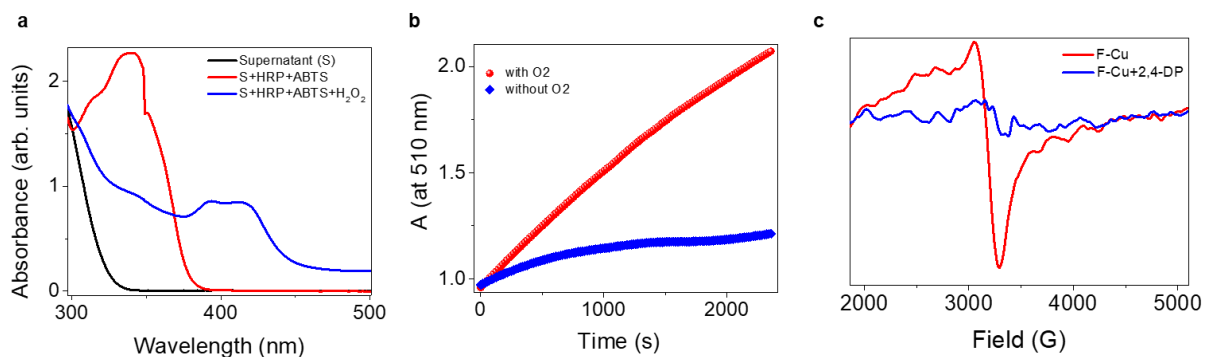

**Supplementary Fig. 5.** Evaluation of laccase-mimicking catalytic activity of F-Cu bionanozymes. **a**, UV-visible absorbance spectra of the control experiment testing the *in-situ* production of H<sub>2</sub>O<sub>2</sub>. **b**, UV-vis kinetic traces at 510 nm in the presence and absence of oxygen (O<sub>2</sub>). Solutions were made anaerobic (without O<sub>2</sub>) by bubbling water-vapor saturated nitrogen for 45 min. **c**, EPR spectra of F-Cu bionanozyme before and after addition of substrate 2,4-DP.

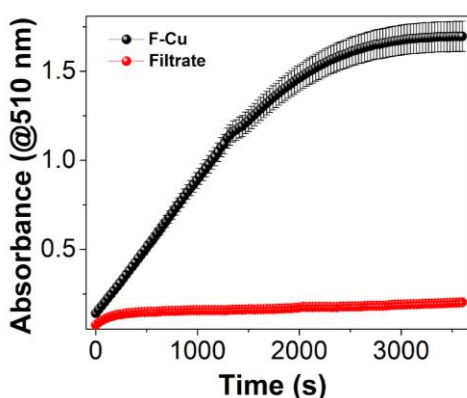

**Supplementary Fig. 6.** Progress of the catalytic 2,4-DP oxidation reaction in the presence of collected F-Cu and filtrate solution. (reaction conditions: F-Cu (1 mg/mL) was incubated in a standard reaction solution (PBS buffer (1X), pH 7.25) at 25 °C for 1800 s and then collected by centrifugation and ultrafiltration. Next, the activity of the filtrate (or leaching) solution was compared with that of the collected F-Cu under the same reaction conditions). The resulting reaction progress showed no significant catalytic activity in the filtrate solution; however, the observed activity is retained in the collected F-Cu bionanozyme. These results demonstrate that the observed catalytic activity mainly originates from the F-Cu bionanozyme themselves and not from any possible dissolved/released Cu<sup>2+</sup> ions or non-assembled structures.

**Supplementary Table 2.** Comparison of relative specific catalytic activity of laccase mimicking nanozymes

| Nanozyme            | Substrate                              | Conditions                                                             | Specific activity of nanozyme, U/mg | Specific activity of laccase, U/mg | Ratio of Specific activity of nanozyme to laccase | Ref.                      |
|---------------------|----------------------------------------|------------------------------------------------------------------------|-------------------------------------|------------------------------------|---------------------------------------------------|---------------------------|
| F-Cu                | 2,4-dichlorophenol & 4-aminoantipyrine | pH 7.2<br>C <sub>cat</sub> = 0.1 mg/mL<br>C <sub>sub</sub> = 0.1 mg/mL | 10.8                                | 0.54                               | 20                                                | This work                 |
| CH-Cu <sup>a</sup>  | 2,4-dichlorophenol                     | pH 6.8<br>C <sub>cat</sub> = 0.1 mg/mL<br>C <sub>sub</sub> = 0.1 mg/mL | 0.012                               | 0.031                              | 0.39                                              | Wang et al. <sup>1</sup>  |
| Cu-CD <sup>b</sup>  | <i>p</i> -phenylenediamine             | pH 7<br>C <sub>sub</sub> = 10 mM                                       | 0.2                                 | 0.5                                | 0.4                                               | Ren et al. <sup>2</sup>   |
| Cu/GMP <sup>c</sup> | 2,4-dichlorophenol & 4-aminoantipyrine | pH 6.8<br>C <sub>cat</sub> = 0.1 mg/mL<br>C <sub>sub</sub> = 0.1 mg/mL | No data                             | No data                            | No data                                           | Liang et al. <sup>3</sup> |

<sup>a</sup>Dipeptide (Cys-His)-coordinated Cu complex

<sup>b</sup>Copper-containing carbon dots

<sup>c</sup>Guanosine monophosphate (GMP)-coordinated copper complex

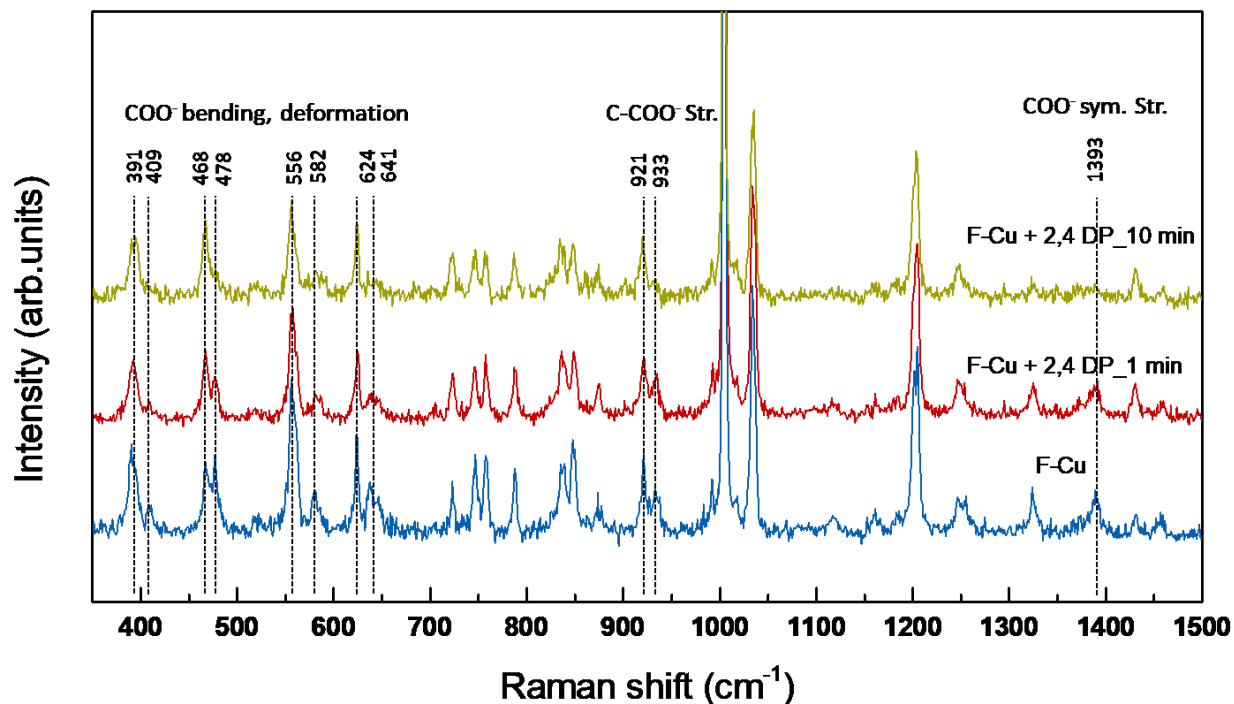

**Supplementary Fig. 7.** Time-dependent changes in the Raman spectrum of F-Cu after the addition of 2,4-DP. Various vibrational modes originating from the carboxylate ion ( $\text{C-COO}^-$ ) such as  $\text{COO}^-$  bending, deformation, symmetric stretching (sym. str.), and  $\text{C-COO}^-$  stretching (str.) modes have been assigned. Note that the signal from 2,4-DP is absent in the spectra due to its low concentration (1 mM).

The Raman spectrum of the F-Cu catalyst before and after the addition of 2,4-DP is shown in Supplementary Fig. 7. The data below  $1500\text{ cm}^{-1}$  is only shown here as no marked changes are observed in the higher wavenumber region. The vibrational modes originating from the carboxylate ion ( $\text{C-COO}^-$ ) are identified based on the mode assignment given in earlier reports.<sup>4-6</sup> The most intense modes observed between  $1000\text{--}1050\text{ cm}^{-1}$  and around  $1200\text{ cm}^{-1}$  originate from the phenyl ring. The modes corresponding to the carboxylate group are important for the present discussion as they are undergoing significant changes upon 2,4-DP addition, while the phenyl ring modes do not exhibit any marked changes. Moreover,  $\text{Cu}^{2+}$  binding and catalytic oxidation are expected to occur at the  $\text{C-COO}^-$  site. The appearance of the doublet modes corresponding to  $\text{COO}^-$  bending, stretching, and deformation vibrations in the Raman spectrum of F-Cu catalyst is due to the coordination of phenylalanine (F) molecules with  $\text{Cu}^{2+}$  ions. Only one mode is observed that corresponds to  $\text{C-COO}^-$  stretching (at  $1393\text{ cm}^{-1}$ ) that may be due to the insufficient intensity of the second mode. When 2,4-DP is added to F-Cu, all the higher wavenumber modes of the doublet  $\text{COO}^-$  vibrations in F-Cu start to weaken in intensity as a function of reaction time. Some of these modes disappeared in the spectrum collected after 10 minutes of reaction. This indicates the weakening of  $\text{Cu}^{2+}$



binding with the carboxylate ion, possibly indicating protonation of carboxylate groups in the F-Cu nanozyme.

### Supplementary References

1. Wang, J. *et al.* Construction of a Bioinspired Laccase-Mimicking Nanozyme for the Degradation and Detection of Phenolic Pollutants. *Appl. Catal. B Environ.* **254**, 452–462 (2019).
2. Ren, X., Liu, J., Ren, J., Tang, F. & Meng, X. One-pot Synthesis of Active Copper-Containing Carbon Dots with Laccase-Like Activities. *Nanoscale* **7**, 19641–19646 (2015).
3. Liang, H. *et al.* Multicopper Laccase Mimicking Nanozymes with Nucleotides as Ligands. *ACS Appl. Mater. Interfaces* **9**, 1352–1360 (2017).
4. Madzharova, F., Heiner, Z. & Kneipp, J. Surface Enhanced Hyper-Raman Scattering of the Amino Acids Tryptophan, Histidine, Phenylalanine, and Tyrosine. *J. Phys. Chem. C* **121**, 1235–1242 (2017).
5. Nabiev, I. R., Savchenko, V. A. & Efremov, E. S. Surface-enhanced Raman Spectra of Aromatic Amino Acids and Proteins Adsorbed by Silver Hydrosols. *J. Raman Spectrosc.* **14**, 375–379 (1983).
6. Hernández, B., Pflüger, F., Kruglik, S. G. & Ghomi, M. Characteristic Raman Lines of Phenylalanine Analyzed by a Multiconformational Approach. *J. Raman Spectrosc.* **44**, 827–833 (2013).
